# Supplementary material for: Multi-ancestry genome-wide association study of cannabis use disorder yields insight into disease biology and public health implications
Source: PubMed Central journal article supplement (PMC10703690; doi:10.1038/s41588-023-01563-z), 2023-11-20

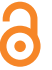

# **Multi-ancestry genome-wide association study of cannabis use disorder yields insight into disease biology and public health implications**

---

In the format provided by the authors and unedited

## Supplementary Information

### Contents

Supplementary Table 1. Within trait  $r_G$

Supplementary Table 2. ICD-9 codes used in the definition of MVP cases

Supplementary Table 3. ICD-10 codes used in the definition of MVP cases

Supplementary Table 4. TWAS

Supplementary Table 5. MR analysis of CanUD on Multisite Chronic Pain

Supplementary Table 6. MR analysis of CanUD on Physical Activity

Supplementary Table 7. MR analysis of CanUD on Schizophrenia

Supplementary Table 8. MR analysis of CanUD on Schizophrenia using  $1 \times 10^{-5}$  threshold

Supplementary Table 9. MR analysis of Multisite Chronic Pain on CanUD using  $1 \times 10^{-5}$  threshold

Supplementary Table 10. MR analysis of Physical Activity

Supplementary Table 11. MR analysis of Schizophrenia on CanUD using  $1 \times 10^{-5}$  threshold

Supplementary Table 12. MR analysis of CanUD on Lung cancer using  $1 \times 10^{-5}$  threshold

Supplementary Table 13. MR analysis of CanUD conditioned on smoking initiation

Supplementary Table 14. MTAG association results

Supplementary Table 15. MTAG effect size comparison

Supplementary Table 16. Extended Demographics

Supplementary Figure 1. Mendelian Randomization

Supplementary Figure 2. Cross Trait  $r_G$

Supplementary Figure 3. Cross Ancestry Genetic Correlation

Supplementary Figure 4. Pathway enrichment

Supplementary Figure 6. GWAS Catalog Reported Gene Enrichment

Supplementary Figure 7. Sex Stratified GWAS Within the MVP

Supplementary table 1. Within trait  $r_G$ . Tests were 2-sided. P-values are uncorrected.

| Trait 1         | Trait 2         | $r_G$ | se     | z      | p        |
|-----------------|-----------------|-------|--------|--------|----------|
| MVP_Definition1 | MVP_Definition2 | 0.99  | 0.0076 | 130.58 | 0.00E+00 |
| MVP_Definition1 | PGC_deCODE_CUD  | 0.77  | 0.0661 | 11.64  | 2.67E-31 |
| MVP_Definition2 | PGC_deCODE_CUD  | 0.75  | 0.063  | 11.93  | 7.80E-33 |
| MVP_Definition1 | iPSYCH2         | 0.70  | 0.0817 | 8.57   | 9.97E-18 |
| MVP_Definition2 | iPSYCH2         | 0.66  | 0.0807 | 8.14   | 3.96E-16 |
| PGC_deCODE_CUD  | iPSYCH2         | 0.87  | 0.102  | 8.51   | 1.80E-17 |

Supplementary Table 2. ICD-9 codes used in the definition of MVP cases.

| <b>ICD Code</b> | <b>ICD Code Description</b>            | <b>Code Type</b> |
|-----------------|----------------------------------------|------------------|
| 304.3           | MARIJUANA DEPENDENCE UNSPECIFIED       | ICD-9            |
| 304.3           | CANNABIS DEPENDENCE UNSPECIFIED        | ICD-9            |
| 304.309         | OTHER CANNABIS DEPENDENCE UNSPECIFIED  | ICD-9            |
| 304.31          | CANNABIS DEPENDENCE, CONTINUOUS USE    | ICD-9            |
| 304.31          | MARIJUANA DEPENDENCE CONTINUOUS        | ICD-9            |
| 304.319         | OTHER CANNABIS DEPENDENCE CONTINUOUS   | ICD-9            |
| 304.32          | CANNABIS DEPENDENCE, EPISODIC USE      | ICD-9            |
| 304.32          | MARIJUANA DEPENDENCE EPISODIC          | ICD-9            |
| 304.329         | OTHER CANNABIS DEPENDENCE EPISODIC     | ICD-9            |
| 304.33          | CANNABIS DEPENDENCE, IN REMISSION      | ICD-9            |
| 304.33          | MARIJUANA DEPENDENCE IN REMISSION      | ICD-9            |
| 304.339         | OTHER CANNABIS DEPENDENCE IN REMISSION | ICD-9            |
| 304.39          | OTHER CANNABIS DEPEND, NEC             | ICD-9            |
| 305.2           | CANNABIS ABUSE UNSPECIFIED             | ICD-9            |
| 305.2           | MARIJUANA ABUSE UNSPECIFIED            | ICD-9            |
| 305.209         | OTHER CANNABIS ABUSE UNSPECIFIED       | ICD-9            |
| 305.21          | CANNABIS ABUSE, CONTINUOUS USE         | ICD-9            |
| 305.21          | MARIJUANA ABUSE CONTINUOUS             | ICD-9            |
| 305.219         | OTHER CANNABIS ABUSE CONTINUOUS        | ICD-9            |
| 305.22          | CANNABIS ABUSE, EPISODIC USE           | ICD-9            |
| 305.22          | MARIJUANA ABUSE EPISODIC               | ICD-9            |
| 305.229         | OTHER CANNABIS ABUSE EPISODIC          | ICD-9            |
| 305.23          | CANNABIS ABUSE, IN REMISSION           | ICD-9            |
| 305.23          | MARIJUANA ABUSE IN REMISSION           | ICD-9            |
| 305.239         | OTHER CANNABIS ABUSE IN REMISSION      | ICD-9            |
| 305.29          | OTHER CANNABIS USE, NEC                | ICD-9            |

Supplementary Table 3. ICD-10 codes used in the definition of MVP cases.

| ICD Code | ICD Code Description                                                    | Code Type |
|----------|-------------------------------------------------------------------------|-----------|
| F12.10   | Cannabis abuse, uncomplicated                                           | ICD-10    |
| F12.11   | Cannabis abuse, in remission                                            | ICD-10    |
| F12.120  | Cannabis abuse with intoxication, uncomplicated                         | ICD-10    |
| F12.121  | Cannabis abuse with intoxication delirium                               | ICD-10    |
| F12.122  | Cannabis abuse with intoxication with perceptual disturbance            | ICD-10    |
| F12.129  | Cannabis abuse with intoxication, unspecified                           | ICD-10    |
| F12.150  | Cannabis abuse with psychotic disorder with delusions                   | ICD-10    |
| F12.151  | Cannabis abuse with psychotic disorder with hallucinations              | ICD-10    |
| F12.159  | Cannabis abuse with psychotic disorder, unspecified                     | ICD-10    |
| F12.180  | Cannabis abuse with cannabis-induced anxiety disorder                   | ICD-10    |
| F12.188  | Cannabis abuse with other cannabis-induced disorder                     | ICD-10    |
| F12.19   | Cannabis abuse with unspecified cannabis-induced disorder               | ICD-10    |
| F12.20   | Cannabis dependence, uncomplicated                                      | ICD-10    |
| F12.21   | Cannabis dependence, in remission                                       | ICD-10    |
| F12.220  | Cannabis dependence with intoxication, uncomplicated                    | ICD-10    |
| F12.221  | Cannabis dependence with intoxication delirium                          | ICD-10    |
| F12.222  | Cannabis dependence with intoxication with perceptual disturbance       | ICD-10    |
| F12.229  | Cannabis dependence with intoxication, unspecified                      | ICD-10    |
| F12.23   | Cannabis dependence with withdrawal                                     | ICD-10    |
| F12.250  | Cannabis dependence with psychotic disorder with delusions              | ICD-10    |
| F12.251  | Cannabis dependence with psychotic disorder with hallucinations         | ICD-10    |
| F12.259  | Cannabis dependence with psychotic disorder, unspecified                | ICD-10    |
| F12.280  | Cannabis dependence with cannabis-induced anxiety disorder              | ICD-10    |
| F12.288  | Cannabis dependence with other cannabis-induced disorder                | ICD-10    |
| F12.29   | Cannabis dependence with unspecified cannabis-induced disorder          | ICD-10    |
| F12.90   | Cannabis use, unspecified, uncomplicated                                | ICD-10    |
| F12.920  | Cannabis use, unspecified with intoxication, uncomplicated              | ICD-10    |
| F12.921  | Cannabis use, unspecified with intoxication delirium                    | ICD-10    |
| F12.922  | Cannabis use, unspecified with intoxication with perceptual disturbance | ICD-10    |
| F12.929  | Cannabis use, unspecified with intoxication, unspecified                | ICD-10    |
| F12.93   | Cannabis use, unspecified with withdrawal                               | ICD-10    |
| F12.950  | Cannabis use, unspecified with psychotic disorder with delusions        | ICD-10    |
| F12.951  | Cannabis use, unspecified with psychotic disorder with hallucinations   | ICD-10    |
| F12.959  | Cannabis use, unspecified with psychotic disorder, unspecified          | ICD-10    |
| F12.980  | Cannabis use, unspecified with anxiety disorder                         | ICD-10    |
| F12.988  | Cannabis use, unspecified with other cannabis-induced disorder          | ICD-10    |
| F12.99   | Cannabis use, unspecified with unspecified cannabis-induced disorder    | ICD-10    |

Supplementary Table 4. TWAS. 4 distinct GWAS-significant loci and 38 novel genetic loci across adult and fetal brain cortex associated with cannabis use, with limited overlap across the two tissues.

| CHR | Gene          | eQTL Dataset                     | TWAS Z-score | TWAS P-value | Permutation P-value |
|-----|---------------|----------------------------------|--------------|--------------|---------------------|
| 16  | PHLPP2        | Adult brain cortex (Gandal 2018) | -7.34        | 2.17E-13     | 9.99E-04            |
| 3   | DALRD3        | Adult brain cortex (Gandal 2018) | -6.15        | 7.51E-10     | 4.91E-02            |
| 3   | DALRD3        | Fetal brain cortex (Walker 2019) | -7.08        | 1.45E-12     | 9.99E-04            |
| 11  | RP11-629G13.1 | Adult brain cortex (Gandal 2018) | -5.20        | 1.98E-07     | 1.50E-03            |
| 5   | ERCC8         | Fetal brain cortex (Walker 2019) | 5.16         | 2.44E-07     | 1.35E-02            |
| 2   | LY75          | Adult brain cortex (Gandal 2018) | 6.20         | 5.58E-10     | 7.99E-03            |
| 3   | CRYBG3        | Adult brain cortex (Gandal 2018) | -4.94        | 7.99E-07     | 3.19E-02            |
| 4   | RP11-700J17.2 | Fetal brain cortex (Walker 2019) | -4.90        | 9.77E-07     | 1.10E-03            |
| 5   | RP11-343L5.2  | Adult brain cortex (Gandal 2018) | 12.26        | 1.43E-34     | 2.40E-03            |
| 6   | RP1-8B1.4     | Adult brain cortex (Gandal 2018) | -5.57        | 2.52E-08     | 9.99E-04            |
| 6   | PKMP3         | Adult brain cortex (Gandal 2018) | 6.38         | 1.75E-10     | 9.99E-04            |
| 6   | RP11-350J20.9 | Adult brain cortex (Gandal 2018) | 8.22         | 2.04E-16     | 1.30E-02            |
| 7   | HIBADH        | Adult brain cortex (Gandal 2018) | -4.88        | 1.07E-06     | 4.40E-03            |
| 7   | CLEC5A        | Adult brain cortex (Gandal 2018) | 7.91         | 2.47E-15     | 2.41E-02            |
| 8   | LNCOC1        | Adult brain cortex (Gandal 2018) | 5.44         | 5.44E-08     | 9.99E-04            |
| 9   | RP11-498P14.5 | Adult brain cortex (Gandal 2018) | 4.85         | 1.21E-06     | 2.35E-02            |
| 10  | BMS1P4        | Adult brain cortex (Gandal 2018) | 5.44         | 5.28E-08     | 9.99E-04            |
| 12  | TAS2R64P      | Adult brain cortex (Gandal 2018) | 9.49         | 2.23E-21     | 3.46E-02            |
| 12  | LINC02361     | Adult brain cortex (Gandal 2018) | -9.19        | 4.06E-20     | 1.97E-02            |
| 15  | RYR3-DT       | Adult brain cortex (Gandal 2018) | -5.52        | 3.34E-08     | 1.50E-03            |
| 15  | SPG21         | Adult brain cortex (Gandal 2018) | 10.74        | 6.43E-27     | 9.99E-04            |
| 16  | RP11-473I1.9  | Adult brain cortex (Gandal 2018) | -4.97        | 6.77E-07     | 3.04E-02            |
| 17  | TMEM220       | Adult brain cortex (Gandal 2018) | -6.20        | 5.77E-10     | 9.99E-04            |
| 17  | USP36         | Adult brain cortex (Gandal 2018) | 8.30         | 9.99E-17     | 2.70E-03            |
| 1   | SRGAP2C       | Fetal brain cortex (Walker 2019) | -10.12       | 4.61E-24     | 9.99E-04            |
| 14  | LGALS3        | Adult brain cortex (Gandal 2018) | 4.81         | 1.48E-06     | 9.99E-04            |
| 11  | PPP1R14B      | Adult brain cortex (Gandal 2018) | 4.82         | 1.43E-06     | 1.10E-03            |
| 21  | PIGP          | Fetal brain cortex (Walker 2019) | -5.94        | 2.78E-09     | 2.89E-02            |
| 5   | TGFBI         | Adult brain cortex (Gandal 2018) | -4.76        | 1.91E-06     | 8.19E-03            |
| 1   | SDCCAG8       | Adult brain cortex (Gandal 2018) | 4.94         | 7.66E-07     | 9.69E-03            |
| 8   | RP11-16E18.3  | Adult brain cortex (Gandal 2018) | 19.73        | 1.2E-86      | 1.20E-03            |
| 2   | PLCL1         | Adult brain cortex (Gandal 2018) | 4.76         | 1.95E-06     | 9.99E-04            |
| 19  | WDR18         | Fetal brain cortex (Walker 2019) | 5.38         | 7.58E-08     | 9.99E-04            |
| 1   | RP11-54O7.18  | Adult brain cortex (Gandal 2018) | 6.77         | 1.25E-11     | 2.66E-02            |
| 12  | ACSS3         | Fetal brain cortex (Walker 2019) | -7.72        | 1.15E-14     | 9.99E-04            |
| 8   | ASAH1         | Fetal brain cortex (Walker 2019) | -5.62        | 1.91E-08     | 9.99E-04            |
| 16  | YPEL3         | Fetal brain cortex (Walker 2019) | -5.60        | 2.16E-08     | 4.90E-02            |
| 1   | RP11-338N10.2 | Fetal brain cortex (Walker 2019) | 5.26         | 1.44E-07     | 1.60E-03            |
| 1   | PBXIP1        | Adult brain cortex (Gandal 2018) | 5.69         | 1.24E-08     | 9.99E-04            |
| 11  | KRTAP5-AS1    | Fetal brain cortex (Walker 2019) | 5.24         | 1.6E-07      | 9.99E-04            |

|   |               |                                  |       |          |          |
|---|---------------|----------------------------------|-------|----------|----------|
| 2 | RP11-482H16.1 | Adult brain cortex (Gandal 2018) | -8.69 | 3.77E-18 | 9.99E-04 |
| 1 | ST3GAL3       | Fetal brain cortex (Walker 2019) | 5.01  | 5.32E-07 | 6.99E-03 |
| 6 | PTMAP1        | Fetal brain cortex (Walker 2019) | -4.73 | 2.27E-06 | 9.99E-04 |

Supplementary Table 5. MR analysis of CanUD on Multisite Chronic Pain using  $5 \times 10^{-8}$  threshold for instrument selection. Tests are two sided. Values shown are uncorrected.

| <b>Cannabis use disorder --&gt; Multisite chronic pain (<math>P_T=5 \times 10^{-8}</math>)</b> |                       |        |                        |       |
|------------------------------------------------------------------------------------------------|-----------------------|--------|------------------------|-------|
| <b>(1) test for heterogeneity among genetic instrument</b>                                     |                       |        |                        |       |
| method                                                                                         | Q                     | Q_df   | Q_pval                 |       |
| MR Egger                                                                                       | 60.69                 | 17     | 8.08x10 <sup>-7</sup>  |       |
| Inverse variance weighted                                                                      | 101.18                | 18     | 1.34x10 <sup>-13</sup> |       |
| <b>(2) test for evidence of horizontal pleiotropy among genetic instrument</b>                 |                       |        |                        |       |
| egger_intercept                                                                                | se                    | pval   |                        |       |
| 0.013                                                                                          | 0.004                 | 0.004  |                        |       |
| <b>(3) retest heterogeneity after outlier removal</b>                                          |                       |        |                        |       |
| method                                                                                         | Q                     | Q_df   | Q_pval                 |       |
| MR Egger                                                                                       | 15.49                 | 10     | 0.115                  |       |
| Inverse variance weighted                                                                      | 18.36                 | 11     | 0.074                  |       |
| <b>(4) retest horizontal pleiotropy after outlier removal</b>                                  |                       |        |                        |       |
| egger_intercept                                                                                | se                    | pval   |                        |       |
| 0.004                                                                                          | 0.003                 | 0.203  |                        |       |
| <b>(5) MR-RAPS overdispersion</b>                                                              |                       |        |                        |       |
| tau.hat                                                                                        | tau.se                | pval   |                        |       |
| 9.41x10 <sup>-7</sup>                                                                          | 4.60x10 <sup>-6</sup> | 0.838  |                        |       |
| <b>(6) test causal effect of exposure on outcome</b>                                           |                       |        |                        |       |
| method                                                                                         | nsnp                  | b      | se                     | pval  |
| MR Egger                                                                                       | 12                    | -0.042 | 0.047                  | 0.390 |
| Weighted Median                                                                                | 12                    | 0.028  | 0.017                  | 0.098 |
| IVW                                                                                            | 12                    | 0.019  | 0.015                  | 0.229 |
| Simple Mode                                                                                    | 12                    | 0.029  | 0.030                  | 0.362 |
| Weighted Mode                                                                                  | 12                    | 0.019  | 0.022                  | 0.421 |
| Robust Adjusted Profile Score (RAPS)                                                           | 12                    | 0.018  | 0.016                  | 0.259 |



Supplementary Table 6. MR analysis of CanUD on Physical Activity (none) using  $1 \times 10^{-8}$  threshold for instrument selection. Tests are two sided. Values shown are uncorrected.

| <b>Cannabis use disorder --&gt; Physical activity (none) (<math>P_T=5 \times 10^{-8}</math>)</b> |                       |       |        |       |
|--------------------------------------------------------------------------------------------------|-----------------------|-------|--------|-------|
| <b>(1) test for heterogeneity among genetic instrument</b>                                       |                       |       |        |       |
| method                                                                                           | Q                     | Q_df  | Q_pval |       |
| MR Egger                                                                                         | 15.86                 | 17    | 0.534  |       |
| Inverse variance weighted                                                                        | 22.93                 | 18    | 0.193  |       |
| <b>(2) test for evidence of horizontal pleiotropy among genetic instrument</b>                   |                       |       |        |       |
| egger_intercept                                                                                  | se                    | pval  |        |       |
| -0.022                                                                                           | 0.008                 | 0.016 |        |       |
| <b>(3) retest heterogeneity after outlier removal</b>                                            |                       |       |        |       |
| method                                                                                           | Q                     | Q_df  | Q_pval |       |
| MR Egger                                                                                         | 9.40                  | 13    | 0.742  |       |
| Inverse variance weighted                                                                        | 12.13                 | 14    | 0.596  |       |
| <b>(4) retest horizontal pleiotropy after outlier removal</b>                                    |                       |       |        |       |
| egger_intercept                                                                                  | se                    | pval  |        |       |
| -0.015                                                                                           | 0.009                 | 0.122 |        |       |
| <b>(5) MR-RAPS overdispersion</b>                                                                |                       |       |        |       |
| tau.hat                                                                                          | tau.se                | pval  |        |       |
| $7.13 \times 10^{-9}$                                                                            | $5.36 \times 10^{-5}$ | 0.999 |        |       |
| <b>(6) test causal effect of exposure on outcome</b>                                             |                       |       |        |       |
| method                                                                                           | nsnp                  | b     | se     | pval  |
| MR Egger                                                                                         | 15                    | 0.116 | 0.140  | 0.419 |
| Weighted Median                                                                                  | 15                    | 0.123 | 0.063  | 0.050 |
| IVW                                                                                              | 15                    | 0.103 | 0.044  | 0.018 |
| Simple Mode                                                                                      | 15                    | 0.159 | 0.106  | 0.154 |
| Weighted Mode                                                                                    | 15                    | 0.147 | 0.099  | 0.159 |
| Robust Adjusted Profile Score (RAPS)                                                             | 15                    | 0.114 | 0.046  | 0.014 |

Supplementary Table 7. MR analysis of CanUD on Schizophrenia using  $1 \times 10^{-8}$  threshold for instrument selection. Tests are two sided. Values shown are uncorrected.

| <b>Cannabis use disorder --&gt; Schizophrenia (<math>P_T=5 \times 10^{-8}</math>)</b> |                        |        |        |       |
|---------------------------------------------------------------------------------------|------------------------|--------|--------|-------|
| <b>(1) test for heterogeneity among genetic instrument</b>                            |                        |        |        |       |
| method                                                                                | Q                      | Q_df   | Q_pval |       |
| MR Egger                                                                              | 2.338                  | 2      | 0.3106 |       |
| Inverse variance weighted                                                             | 2.453                  | 3      | 0.4839 |       |
| <b>(2) test for evidence of horizontal pleiotropy among genetic instrument</b>        |                        |        |        |       |
| egger_intercept                                                                       | se                     | pval   |        |       |
| 0.0263                                                                                | 0.0843                 | 0.7843 |        |       |
| <b>(3) retest heterogeneity after outlier removal</b>                                 |                        |        |        |       |
| method                                                                                | Q                      | Q_df   | Q_pval |       |
| MR Egger                                                                              | -                      | -      | -      |       |
| Inverse variance weighted                                                             | -                      | -      | -      |       |
| <b>(4) retest horizontal pleiotropy after outlier removal</b>                         |                        |        |        |       |
| egger_intercept                                                                       | se                     | pval   |        |       |
| -                                                                                     | -                      | -      |        |       |
| <b>(5) MR-RAPS overdispersion</b>                                                     |                        |        |        |       |
| tau.hat                                                                               | tau.se                 | pval   |        |       |
| $7.804 \times 10^{-9}$                                                                | $4.957 \times 10^{-5}$ | 0.999  |        |       |
| <b>(6) test causal effect of exposure on outcome</b>                                  |                        |        |        |       |
| method                                                                                | nsnp                   | b      | se     | pval  |
| MR Egger                                                                              | 4                      | 0.838  | 3.06   | 0.810 |
| Weighted Median                                                                       | 4                      | 0.107  | 0.213  | 0.616 |
| IVW                                                                                   | 4                      | 0.115  | 0.159  | 0.469 |
| Simple Mode                                                                           | 4                      | 0.195  | 0.284  | 0.542 |
| Weighted Mode                                                                         | 4                      | 0.113  | 0.278  | 0.711 |
| Robust Adjusted Profile Score (RAPS)                                                  | 4                      | 0.127  | 0.186  | 0.496 |

Supplementary Table 8. MR analysis of CanUD on Schizophrenia using  $1 \times 10^{-5}$  threshold for instrument selection. Tests are two sided. Values shown are uncorrected.

| <b>Cannabis use disorder --&gt; Schizophrenia (<math>P_T=1 \times 10^{-5}</math>)</b> |                        |        |        |        |
|---------------------------------------------------------------------------------------|------------------------|--------|--------|--------|
| <b>(1) test for heterogeneity among genetic instrument</b>                            |                        |        |        |        |
| method                                                                                | Q                      | Q_df   | Q_pval |        |
| MR Egger                                                                              | 51.479                 | 29     | 0.0062 |        |
| Inverse variance weighted                                                             | 52.56                  | 30     | 0.0066 |        |
| <b>(2) test for evidence of horizontal pleiotropy among genetic instrument</b>        |                        |        |        |        |
| egger_intercept                                                                       | se                     | pval   |        |        |
| 0.0072                                                                                | 0.0092                 | 0.442  |        |        |
| <b>(3) retest heterogeneity after outlier removal</b>                                 |                        |        |        |        |
| method                                                                                | Q                      | Q_df   | Q_pval |        |
| MR Egger                                                                              | 16.471                 | 27     | 0.943  |        |
| Inverse variance weighted                                                             | 18.131                 | 28     | 0.923  |        |
| <b>(4) retest horizontal pleiotropy after outlier removal</b>                         |                        |        |        |        |
| egger_intercept                                                                       | se                     | pval   |        |        |
| 0.0093                                                                                | 0.0072                 | 0.208  |        |        |
| <b>(5) MR-RAPS overdispersion</b>                                                     |                        |        |        |        |
| tau.hat                                                                               | tau.se                 | pval   |        |        |
| $9.669 \times 10^{-9}$                                                                | $2.805 \times 10^{-5}$ | 0.999  |        |        |
| <b>(6) test causal effect of exposure on outcome</b>                                  |                        |        |        |        |
| method                                                                                | nsnp                   | b      | se     | pval   |
| MR Egger                                                                              | 29                     | 0.1622 | 0.2743 | 0.5593 |
| Weighted Median                                                                       | 29                     | 0.1861 | 0.1002 | 0.0632 |
| IVW                                                                                   | 29                     | 0.1797 | 0.0698 | 0.0101 |
| Simple Mode                                                                           | 29                     | 0.2243 | 0.1842 | 0.1955 |
| Weighted Mode                                                                         | 29                     | 0.2235 | 0.1811 | 0.2276 |
| Robust Adjusted Profile Score (RAPS)                                                  | 29                     | 0.1922 | 0.0859 | 0.0251 |

Supplementary Table 9. MR analysis of Multisite Chronic Pain on CanUD using  $1 \times 10^{-5}$  threshold for instrument selection. Tests are two sided. Values shown are uncorrected.

| <b>Multisite chronic pain --&gt; Cannabis use disorder (<math>P_T=5 \times 10^{-8}</math>)</b> |                       |       |                       |                       |
|------------------------------------------------------------------------------------------------|-----------------------|-------|-----------------------|-----------------------|
| <b>(1) test for heterogeneity among genetic instrument</b>                                     |                       |       |                       |                       |
| method                                                                                         | Q                     | Q_df  | Q_pval                |                       |
| MR Egger                                                                                       | 117.96                | 41    | $2.24 \times 10^{-9}$ |                       |
| Inverse variance weighted                                                                      | 120.89                | 42    | $1.44 \times 10^{-9}$ |                       |
| <b>(2) test for evidence of horizontal pleiotropy among genetic instrument</b>                 |                       |       |                       |                       |
| egger_intercept                                                                                | se                    | pval  |                       |                       |
| 0.014                                                                                          | 0.013                 | 0.319 |                       |                       |
| <b>(3) retest heterogeneity after outlier removal</b>                                          |                       |       |                       |                       |
| method                                                                                         | Q                     | Q_df  | Q_pval                |                       |
| MR Egger                                                                                       | 35.89                 | 36    | 0.473                 |                       |
| Inverse variance weighted                                                                      | 36.81                 | 37    | 0.478                 |                       |
| <b>(4) retest horizontal pleiotropy after outlier removal</b>                                  |                       |       |                       |                       |
| egger_intercept                                                                                | se                    | pval  |                       |                       |
| -0.009                                                                                         | 0.009                 | 0.342 |                       |                       |
| <b>(5) MR-RAPS overdispersion</b>                                                              |                       |       |                       |                       |
| tau.hat                                                                                        | tau.se                | pval  |                       |                       |
| $7.09 \times 10^{-6}$                                                                          | $2.62 \times 10^{-5}$ | 0.787 |                       |                       |
| <b>(6) test causal effect of exposure on outcome</b>                                           |                       |       |                       |                       |
| method                                                                                         | nsnp                  | b     | se                    | pval                  |
| MR Egger                                                                                       | 38                    | 1.03  | 0.603                 | 0.046                 |
| Weighted Median                                                                                | 38                    | 0.680 | 0.150                 | $6.24 \times 10^{-6}$ |
| IVW                                                                                            | 38                    | 0.460 | 0.110                 | $2.90 \times 10^{-5}$ |
| Simple Mode                                                                                    | 38                    | 0.752 | 0.299                 | 0.016                 |
| Weighted Mode                                                                                  | 38                    | 0.742 | 0.281                 | 0.012                 |
| Robust Adjusted Profile Score (RAPS)                                                           | 38                    | 0.514 | 0.118                 | $1.25 \times 10^{-5}$ |

Supplementary Table 10. MR analysis of Physical Activity (none) on CanUD using  $1 \times 10^{-6}$  threshold for instrument selection. Tests are two sided. Values shown are uncorrected.

| <b>Physical activity (none) --&gt; Cannabis use disorder (<math>P_T=1 \times 10^{-6}</math>)</b> |                       |       |        |                       |
|--------------------------------------------------------------------------------------------------|-----------------------|-------|--------|-----------------------|
| <b>(1) test for heterogeneity among genetic instrument</b>                                       |                       |       |        |                       |
| method                                                                                           | Q                     | Q_df  | Q_pval |                       |
| MR Egger                                                                                         | 16.65                 | 11    | 0.119  |                       |
| Inverse variance weighted                                                                        | 16.78                 | 12    | 0.158  |                       |
| <b>(2) test for evidence of horizontal pleiotropy among genetic instrument</b>                   |                       |       |        |                       |
| egger_intercept                                                                                  | se                    | Pval  |        |                       |
| -0.023                                                                                           | -0.005                | 0.016 | 0.781  |                       |
| <b>(3) retest heterogeneity after outlier removal</b>                                            |                       |       |        |                       |
| Method                                                                                           | Q                     | Q_df  | Q_pval |                       |
| MR Egger                                                                                         | -                     | -     | -      |                       |
| Inverse variance weighted                                                                        | -                     | -     | -      |                       |
| <b>(4) retest horizontal pleiotropy after outlier removal</b>                                    |                       |       |        |                       |
| egger_intercept                                                                                  | se                    | pval  |        |                       |
| -                                                                                                | -                     | -     |        |                       |
| <b>(5) MR-RAPS overdispersion</b>                                                                |                       |       |        |                       |
| tau.hat                                                                                          | tau.se                | pval  |        |                       |
| $2.32 \times 10^{-5}$                                                                            | $9.73 \times 10^{-5}$ | 0.812 |        |                       |
| <b>(6) test causal effect of exposure on outcome</b>                                             |                       |       |        |                       |
| method                                                                                           | nsnp                  | b     | se     | pval                  |
| MR Egger                                                                                         | 13                    | 0.200 | 0.241  | 0.424                 |
| Weighted Median                                                                                  | 13                    | 0.261 | 0.084  | 0.002                 |
| IVW                                                                                              | 13                    | 0.266 | 0.069  | $1.17 \times 10^{-4}$ |
| Simple Mode                                                                                      | 13                    | 0.241 | 0.136  | 0.101                 |
| Weighted Mode                                                                                    | 13                    | 0.225 | 0.115  | 0.074                 |
| Robust Adjusted Profile Score (RAPS)                                                             | 13                    | 0.271 | 0.078  | $5.06 \times 10^{-4}$ |

Supplementary Table 11. MR analysis of Schizophrenia on CanUD using  $1 \times 10^{-5}$  threshold for instrument selection. Tests are two sided. Values shown are uncorrected.

| <b>Schizophrenia --&gt; Cannabis use disorder (<math>P_T=5 \times 10^{-8}</math>)</b> |                       |        |        |                       |
|---------------------------------------------------------------------------------------|-----------------------|--------|--------|-----------------------|
| <b>(1) test for heterogeneity among genetic instrument</b>                            |                       |        |        |                       |
| method                                                                                | Q                     | Q_df   | Q_pval |                       |
| MR Egger                                                                              | 53.809                | 119    | 1      |                       |
| Inverse variance weighted                                                             | 52.323                | 120    | 1      |                       |
| <b>(2) test for evidence of horizontal pleiotropy among genetic instrument</b>        |                       |        |        |                       |
| egger_intercept                                                                       | se                    | pval   |        |                       |
| 0.003                                                                                 | 0.004                 | 0.475  |        |                       |
| <b>(3) retest heterogeneity after outlier removal</b>                                 |                       |        |        |                       |
| method                                                                                | Q                     | Q_df   | Q_pval |                       |
| MR Egger                                                                              | -                     | -      | -      |                       |
| Inverse variance weighted                                                             | -                     | -      | -      |                       |
| <b>(4) retest horizontal pleiotropy after outlier removal</b>                         |                       |        |        |                       |
| egger_intercept                                                                       | se                    | pval   |        |                       |
| -                                                                                     | -                     | -      |        |                       |
| <b>(5) MR-RAPS overdispersion</b>                                                     |                       |        |        |                       |
| tau.hat                                                                               | tau.se                | pval   |        |                       |
| $8.87 \times 10^{-9}$                                                                 | $1.68 \times 10^{-5}$ | 0.999  |        |                       |
| <b>(6) test causal effect of exposure on outcome</b>                                  |                       |        |        |                       |
| method                                                                                | nsnp                  | b      | se     | pval                  |
| MR Egger                                                                              | 121                   | 0.0546 | 0.1592 | 0.7324                |
| Weighted Median                                                                       | 121                   | 0.1601 | 0.0534 | 0.0031                |
| IVW                                                                                   | 121                   | 0.1653 | 0.0388 | $2.07 \times 10^{-5}$ |
| Simple Mode                                                                           | 121                   | 0.1243 | 0.1434 | 0.3877                |
| Weighted Mode                                                                         | 121                   | 0.1243 | 0.1372 | 0.3669                |
| Robust Adjusted Profile Score (RAPS)                                                  | 121                   | 0.1816 | 0.0427 | $2.07 \times 10^{-5}$ |

Supplementary Table 12. MR analysis of CanUD on Lung cancer using  $1 \times 10^{-5}$  threshold for instrument selection. Tests are two sided. Values shown are uncorrected.

| <b>Cannabis use disorder --&gt; Lung cancer (<math>P_T=10^{-5}</math>)</b>     |                      |          |         |           |
|--------------------------------------------------------------------------------|----------------------|----------|---------|-----------|
| <b>(1) test for heterogeneity among genetic instrument</b>                     |                      |          |         |           |
| method                                                                         | Q                    | Q_df     | Q_pval  |           |
| MR Egger                                                                       | 132.67               | 90       | 0.002   |           |
| Inverse variance weighted                                                      | 133.70               | 91       | 0.002   |           |
| <b>(2) test for evidence of horizontal pleiotropy among genetic instrument</b> |                      |          |         |           |
| egger_intercept                                                                | se                   | pval     |         |           |
| 0.009                                                                          | 0.011                | 0.40     |         |           |
| <b>(3) retest heterogeneity after outlier removal</b>                          |                      |          |         |           |
| method                                                                         | Q                    | Q_df     | Q_pval  |           |
| MR Egger                                                                       | 129.76               | 89       | 0.003   |           |
| Inverse variance weighted                                                      | 131.07               | 90       | 0.003   |           |
| <b>(4) retest horizontal pleiotropy after outlier removal</b>                  |                      |          |         |           |
| egger_intercept                                                                | se                   | pval     |         |           |
| 0.010                                                                          | 0.011                | 0.35     |         |           |
| <b>(5) MR-RAPS overdispersion</b>                                              |                      |          |         |           |
| tau2.hat                                                                       | tau2.se              | beta.hat | beta.se | beta.pval |
| $5.0 \times 10^{-4}$                                                           | $3.7 \times 10^{-4}$ | 0.207    | 0.064   | 0.001     |
| <b>(6) test causal effect of exposure on outcome</b>                           |                      |          |         |           |
| method                                                                         | nsnp                 | b        | se      | pval      |
| MR Egger                                                                       | 92                   | 0.06     | 0.16    | 0.71      |
| Weighted Median                                                                | 92                   | 0.25     | 0.09    | 0.006     |
| IVW                                                                            | 92                   | 0.18     | 0.07    | 0.006     |
| Simple Mode                                                                    | 92                   | 0.29     | 0.22    | 0.21      |
| Weighted Mode                                                                  | 92                   | 0.25     | 0.18    | 0.18      |
| Robust Adjusted Profile Score (RAPS)                                           | 92                   | 0.206    | 0.054   | 0.0001    |

Supplementary Table 13. MR analysis of CanUD conditioned on smoking initiation from GSCAN2<sup>34</sup> on Lung cancer using  $1 \times 10^{-5}$  threshold for instrument selection. Tests are two sided. Values shown are uncorrected.

| <b>Cannabis use disorder --&gt; Lung cancer (<math>P_T=10^{-5}</math>)</b>     |                      |          |                      |           |
|--------------------------------------------------------------------------------|----------------------|----------|----------------------|-----------|
| <b>(1) test for heterogeneity among genetic instrument</b>                     |                      |          |                      |           |
| method                                                                         | Q                    | Q_df     | Q_pval               |           |
| MR Egger                                                                       | 130.07               | 83       | 7.4x10 <sup>-4</sup> |           |
| Inverse variance weighted                                                      | 134.20               | 84       | 4.1x10 <sup>-4</sup> |           |
| <b>(2) test for evidence of horizontal pleiotropy among genetic instrument</b> |                      |          |                      |           |
| egger_intercept                                                                | se                   | pval     |                      |           |
| -0.025                                                                         | 0.015                | 0.11     |                      |           |
| <b>(3) retest heterogeneity after outlier removal</b>                          |                      |          |                      |           |
| method                                                                         | Q                    | Q_df     | Q_pval               |           |
| MR Egger                                                                       | 128.46               | 82       | 8.0x10 <sup>-4</sup> |           |
| Inverse variance weighted                                                      | 131.64               | 83       | 5.4x10 <sup>-4</sup> |           |
| <b>(4) retest horizontal pleiotropy after outlier removal</b>                  |                      |          |                      |           |
| egger_intercept                                                                | se                   | pval     |                      |           |
| -0.022                                                                         | 0.016                | 0.16     |                      |           |
| <b>(5) MR-RAPS overdispersion</b>                                              |                      |          |                      |           |
| tau2.hat                                                                       | tau2.se              | beta.hat | beta.se              | beta.pval |
| 7.9x10 <sup>-4</sup>                                                           | 3.7x10 <sup>-4</sup> | 0.204    | 0.089                | 0.021     |
| <b>(6) test causal effect of exposure on outcome</b>                           |                      |          |                      |           |
| method                                                                         | nsnp                 | b        | se                   | pval      |
| MR Egger                                                                       | 85                   | 0.64     | 0.28                 | 0.027     |
| Weighted Median                                                                | 85                   | 0.23     | 0.11                 | 0.032     |
| IVW                                                                            | 85                   | 0.20     | 0.089                | 0.025     |
| Simple Mode                                                                    | 85                   | 0.21     | 0.27                 | 0.44      |
| Weighted Mode                                                                  | 85                   | 0.28     | 0.26                 | 0.28      |



|                                         |    |       |       |                      |
|-----------------------------------------|----|-------|-------|----------------------|
| Robust Adjusted Profile Score<br>(RAPS) | 85 | 0.198 | 0.070 | $4.6 \times 10^{-3}$ |
|-----------------------------------------|----|-------|-------|----------------------|

Supplementary Table 14. MTAG association results for genomic risk loci for CanUD/ND/AUD.

Tests were two-sided. P-values are uncorrected.

| rsID       | CHR | BP        | Effect allele | Other allele | EAF  | Beta   | SE     | P value  |
|------------|-----|-----------|---------------|--------------|------|--------|--------|----------|
| rs10799122 | 1   | 29168766  | T             | G            | 0.33 | 0.019  | 0.0034 | 4.01E-08 |
| rs7519259  | 1   | 66434743  | A             | G            | 0.52 | 0.024  | 0.0032 | 1.12E-13 |
| rs12061680 | 1   | 73778378  | A             | G            | 0.59 | -0.021 | 0.0032 | 6.63E-11 |
| rs1526480  | 1   | 91209986  | T             | C            | 0.38 | -0.022 | 0.0033 | 5.18E-12 |
| rs3897854  | 1   | 97918306  | T             | C            | 0.45 | -0.017 | 0.0032 | 4.25E-08 |
| rs472140   | 2   | 45139904  | T             | C            | 0.58 | 0.021  | 0.0032 | 1.44E-10 |
| rs1594166  | 2   | 185787586 | T             | G            | 0.66 | -0.019 | 0.0034 | 1.05E-08 |
| rs1372072  | 3   | 16955259  | A             | G            | 0.36 | 0.019  | 0.0033 | 5.08E-09 |
| rs12497569 | 3   | 49364830  | A             | G            | 0.56 | -0.024 | 0.0032 | 4.32E-14 |
| rs9834272  | 3   | 55967193  | T             | C            | 0.05 | 0.042  | 0.0074 | 2.06E-08 |
| rs726610   | 3   | 85551403  | T             | C            | 0.64 | -0.022 | 0.0033 | 2.33E-11 |
| rs13107325 | 4   | 103188709 | T             | C            | 0.08 | -0.041 | 0.0057 | 5.05E-13 |
| rs4546329  | 5   | 60589739  | T             | C            | 0.49 | 0.019  | 0.0032 | 1.72E-09 |
| rs62461186 | 7   | 77730153  | A             | C            | 0.17 | 0.026  | 0.0042 | 4.93E-10 |
| rs1989903  | 7   | 114137940 | A             | G            | 0.59 | -0.019 | 0.0032 | 6.31E-09 |
| rs11778040 | 8   | 27419807  | T             | C            | 0.20 | -0.023 | 0.0040 | 5.34E-09 |
| rs864882   | 9   | 127968109 | T             | C            | 0.30 | -0.024 | 0.0034 | 2.63E-12 |
| rs1637570  | 10  | 118619529 | A             | G            | 0.72 | -0.020 | 0.0035 | 8.41E-09 |
| rs10835372 | 11  | 28643913  | T             | C            | 0.37 | 0.021  | 0.0033 | 1.67E-10 |
| rs11570190 | 11  | 57560452  | A             | C            | 0.33 | -0.022 | 0.0034 | 6.39E-11 |
| rs6589386  | 11  | 113443753 | T             | C            | 0.43 | -0.023 | 0.0032 | 2.04E-12 |
| rs1944688  | 11  | 121635463 | A             | G            | 0.76 | 0.022  | 0.0037 | 5.42E-09 |
| rs850254   | 14  | 57350427  | A             | G            | 0.57 | -0.018 | 0.0032 | 2.58E-08 |
| rs73403005 | 15  | 47645174  | A             | G            | 0.17 | -0.024 | 0.0043 | 2.24E-08 |
| rs4702     | 15  | 91426560  | A             | G            | 0.55 | -0.018 | 0.0032 | 3.32E-08 |
| rs72833102 | 17  | 55663552  | A             | G            | 0.15 | 0.025  | 0.0045 | 1.55E-08 |

Supplementary Table 15. Effect size comparison between the variants significant in the MTAG analysis and GWAS. The difference in effect sizes reaching the Bonferroni significant threshold ( $1.92E-03$ ) are highlighted in green. Tests were two-sided.

| rsid       | Beta<br>GWAS | se<br>GWAS | pval<br>GWAS | beta<br>MTAG | se<br>MTAG | pval<br>MTAG | z score | p value  |
|------------|--------------|------------|--------------|--------------|------------|--------------|---------|----------|
| rs10799122 | 0.045        | 0.009      | 2.95E-07     | 0.019        | 0.003      | 4.01E-08     | 2.998   | 4.46E-03 |
| rs7519259  | 0.050        | 0.008      | 1.83E-09     | 0.024        | 0.003      | 1.12E-13     | 3.197   | 2.41E-03 |
| rs12061680 | -0.044       | 0.008      | 1.09E-07     | -0.021       | 0.003      | 6.63E-11     | -2.776  | 8.47E-03 |
| rs1526480  | -0.052       | 0.008      | 5.91E-10     | -0.022       | 0.003      | 5.18E-12     | -3.502  | 8.67E-04 |
| rs3897854  | -0.036       | 0.009      | 3.63E-05     | -0.017       | 0.003      | 4.25E-08     | -2.150  | 3.95E-02 |
| rs472140   | 0.040        | 0.009      | 2.02E-06     | 0.021        | 0.003      | 1.44E-10     | 2.328   | 2.65E-02 |
| rs1594166  | -0.041       | 0.009      | 2.15E-06     | -0.019       | 0.003      | 1.05E-08     | -2.528  | 1.63E-02 |
| rs1372072  | 0.041        | 0.009      | 1.60E-06     | 0.019        | 0.003      | 5.08E-09     | 2.516   | 1.69E-02 |
| rs12497569 | -0.057       | 0.008      | 7.54E-12     | -0.024       | 0.003      | 4.32E-14     | -3.916  | 1.87E-04 |
| rs9834272  | 0.097        | 0.019      | 1.57E-07     | 0.042        | 0.007      | 2.06E-08     | 2.986   | 4.62E-03 |
| rs726610   | -0.056       | 0.009      | 4.29E-11     | -0.022       | 0.003      | 2.33E-11     | -4.029  | 1.19E-04 |
| rs13107325 | -0.077       | 0.017      | 3.36E-06     | -0.041       | 0.006      | 5.05E-13     | -2.129  | 4.14E-02 |
| rs4546329  | 0.045        | 0.008      | 1.01E-07     | 0.019        | 0.003      | 1.72E-09     | 3.059   | 3.70E-03 |
| rs62461186 | 0.068        | 0.011      | 8.76E-10     | 0.026        | 0.004      | 4.93E-10     | 3.768   | 3.30E-04 |
| rs1989903  | -0.047       | 0.008      | 1.55E-08     | -0.019       | 0.003      | 6.31E-09     | -3.403  | 1.22E-03 |
| rs11778040 | -0.070       | 0.011      | 3.22E-11     | -0.023       | 0.004      | 5.34E-09     | -4.463  | 1.89E-05 |
| rs864882   | -0.057       | 0.009      | 3.12E-10     | -0.024       | 0.003      | 2.63E-12     | -3.599  | 6.14E-04 |
| rs1637570  | -0.050       | 0.009      | 4.79E-08     | -0.020       | 0.004      | 8.41E-09     | -3.205  | 2.35E-03 |
| rs10835372 | 0.047        | 0.009      | 3.03E-08     | 0.021        | 0.003      | 1.67E-10     | 3.078   | 3.49E-03 |
| rs11570190 | -0.044       | 0.009      | 2.88E-07     | -0.022       | 0.003      | 6.39E-11     | -2.592  | 1.39E-02 |
| rs6589386  | -0.040       | 0.008      | 1.10E-06     | -0.023       | 0.003      | 2.04E-12     | -2.140  | 4.04E-02 |
| rs1944688  | 0.047        | 0.010      | 6.22E-06     | 0.022        | 0.004      | 5.42E-09     | 2.420   | 2.13E-02 |
| rs850254   | -0.047       | 0.009      | 2.58E-07     | -0.018       | 0.003      | 2.58E-08     | -3.187  | 2.48E-03 |
| rs73403005 | -0.039       | 0.011      | 3.22E-04     | -0.024       | 0.004      | 2.24E-08     | -1.414  | 1.47E-01 |
| rs4702     | -0.047       | 0.009      | 1.67E-07     | -0.018       | 0.003      | 3.32E-08     | -3.270  | 1.90E-03 |
| rs72833102 | 0.055        | 0.012      | 1.71E-06     | 0.025        | 0.004      | 1.55E-08     | 2.592   | 1.39E-02 |

Supplementary Table 16. Extended Demographics. Extended data where available. Specific values were not available for all cohorts based on previously published data. Age was not available in all PGC samples

|               | Age        | Ascertainment                                                                               | %F     | SES?                      |
|---------------|------------|---------------------------------------------------------------------------------------------|--------|---------------------------|
| MVP           | 63.8       | US Military veterans using the US Department of Veterans Affairs national healthcare system | 7.4%   | \$39,190                  |
| CATS          | 36         | Opioid substitution clinics                                                                 | 40%    | 83% unemployed            |
| CADD          |            |                                                                                             | 30%    |                           |
| CHDS          | 18-35      | Birth cohort                                                                                | 52%    |                           |
| FSCD          | 36.5       | Treatment Centers                                                                           | 53%    | 25-60% unemployed         |
| COGEN<br>D    | 37         | community-based & treatment                                                                 | 20-49% | 10% less than high school |
| GEDI-<br>GSMS | 9y-30y*    | Rural community                                                                             | 47%    | Rural                     |
| ADAA          | 41.2       | treatment centers                                                                           | 57%    |                           |
| BLTS          | 26 (18-38) | community twins                                                                             | 58%    |                           |
| MCTFR         | 20.6       | community twins                                                                             | 46%    |                           |
| Yale-<br>Penn | 39.5       |                                                                                             | 42%    |                           |
| COGA          |            | in-patient treatment centers & out-patient clinics, community comparison families           | 55%    |                           |
| CEDAR         |            | Various (community & treatment)                                                             | 37%    |                           |
| OZ-ALC        | 43         | community-based                                                                             | 49%    |                           |
| VTSABD        | 8y-30y*    | cohort longitudinal                                                                         | 62%    |                           |
| IASPSAD       | 41         | treatment facilities                                                                        | 50%    | 35% unemployed            |
| deCODE        | 66.5       | Treatment Center                                                                            | 59.50% |                           |

\*Age range reported for longitudinal cohort.

ADAA=Alcohol Dependence in African Americans. BLTS= Brisbane Longitudinal Twin Study. CADD=Center on Antisocial Drug Dependence. CATS=Comorbidity and Trauma Study. CEDAR= Center for Education and Drug Abuse Research. CHDS=Christchurch Health and Development Study. COGA=Collaborative Study on the Genetics of Alcoholism. COGEN D=Collaborative Genetic Study of Nicotine Dependence. FSCD=Family Study of Cocaine Dependence. GEDI=Gene-Environment-Development Initiative. GSMS=Great Smoky Mountains Study. IASPSAD=Irish Affected Sib-Pair Study of Alcohol Dependence. MCTFR= Minnesota Center for Twin and Family Research. OZ-ALC=Australian Alcohol and Nicotine Studies. VTSABD=Virginia Twin Studies of Adolescent Behavioral Development. deCODE = deCODE genetics

Supplementary Figure 1. Mendelian Randomization. On the left are the effect of CanUD instruments on (from top to bottom) schizophrenia, multisite chronic pain, and physical activity past 4 weeks (None). On the right are instruments from schizophrenia, multisite chronic pain, and physical activity past 4 weeks (None), respectively, on CanUD. Bilateral effect was observed for schizophrenia, while a unidirectional effect was found for multisite chronic pain on CanUD. Standard error depicted on each axis for each variant/trait relationship.

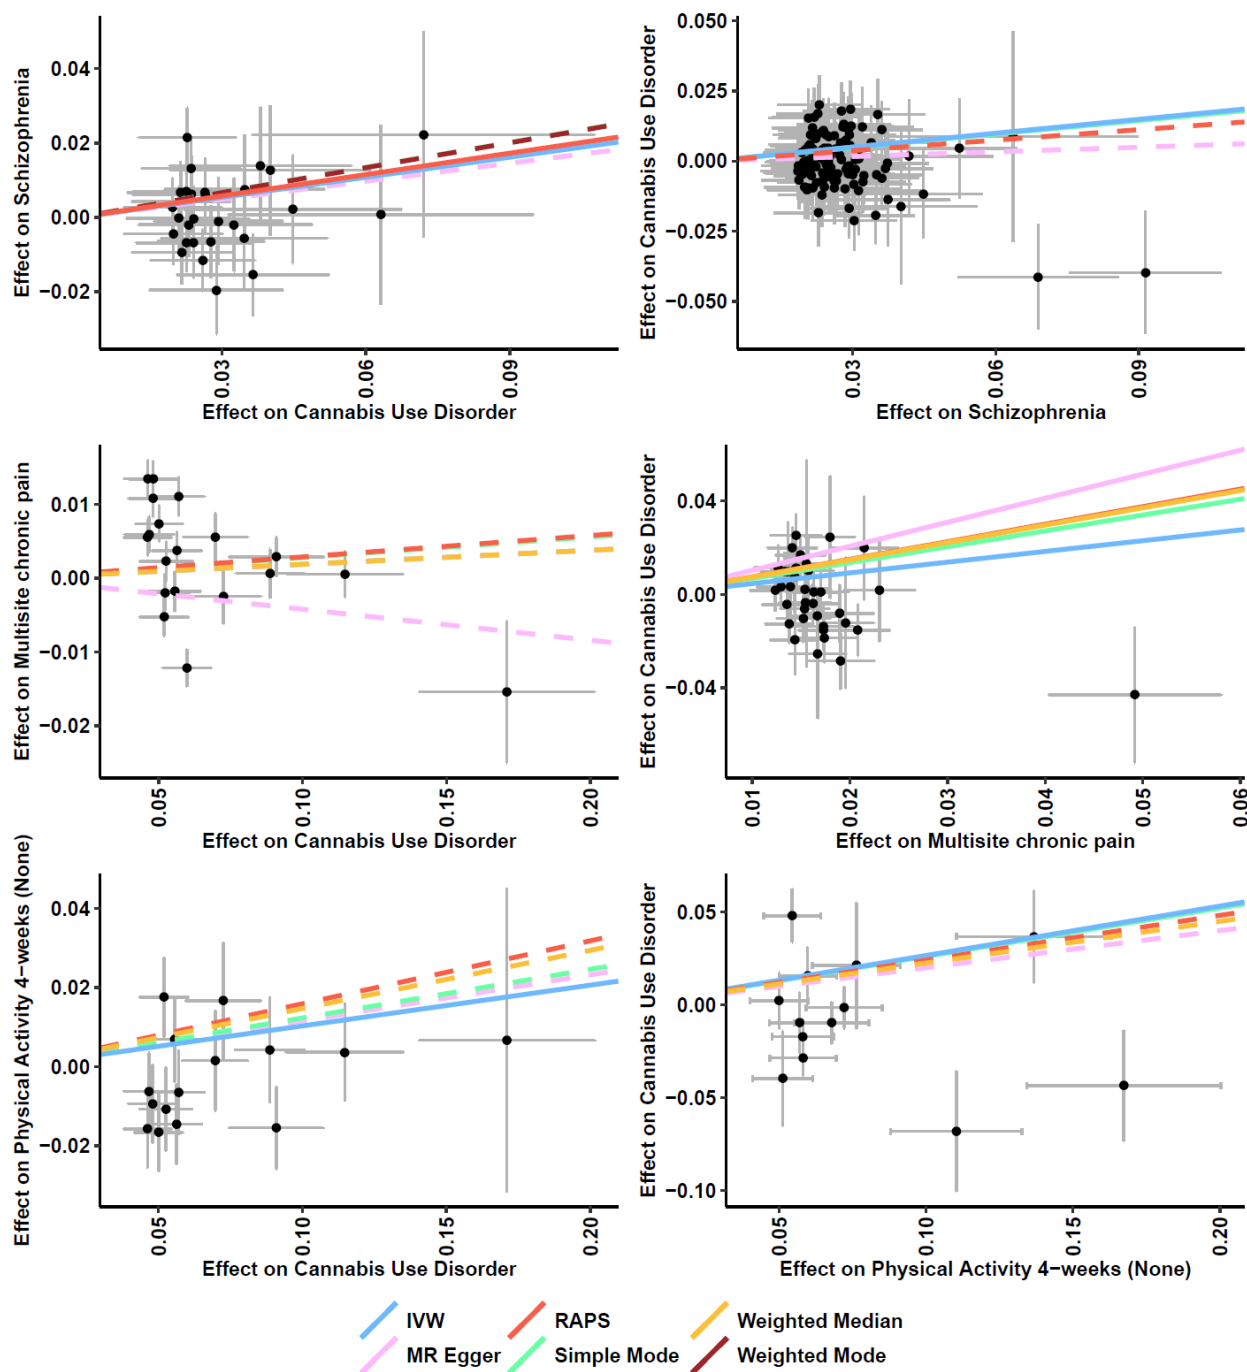

Supplementary Figure 2. Cross Trait  $r_G$ . Multi-trait  $r_G$  volcano plot calculated using 1,335 traits available in CTG-Lab. Red lines indicate a threshold of absolute  $r_G > 0.50$  (x-axis) or significant p-value following correction for multiple comparisons for 1335 traits. Statistical tests were two-sided.

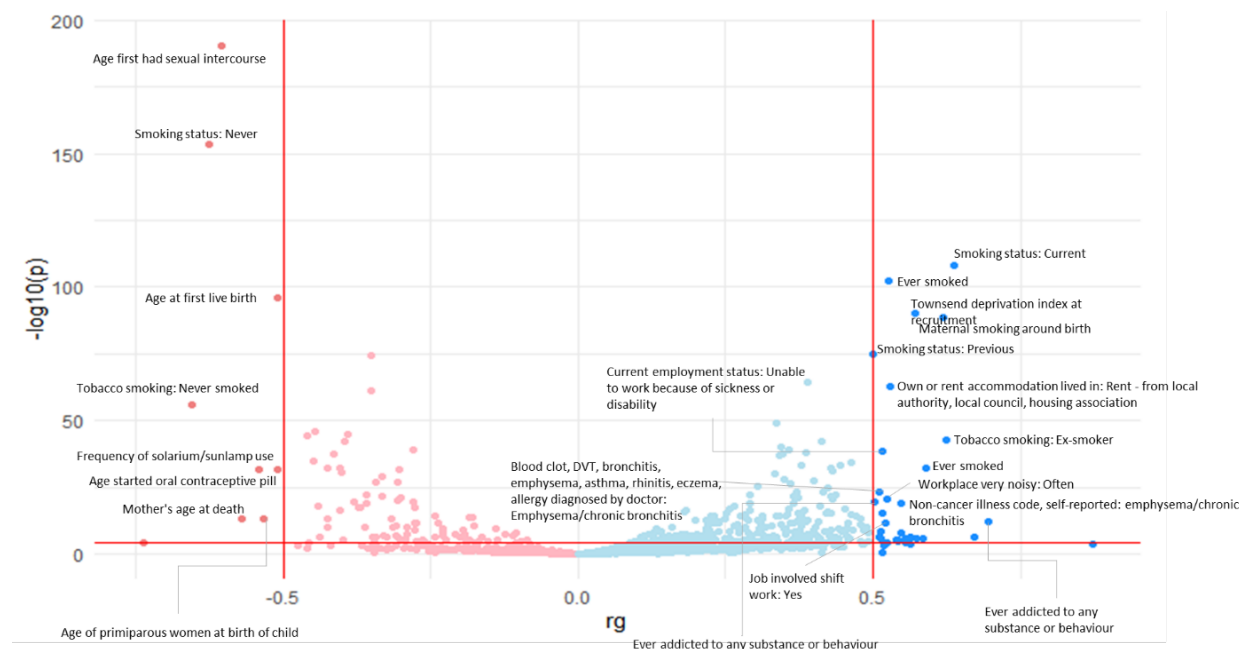

Supplementary Figure 3. Cross Ancestry Genetic Correlation. X axis (left) depicts the range of  $r_G$  between 1 and -1 while. Peach bars and purple bars depict  $r_G$  point estimate per trait for CanUD in EUR and AFR, respectively. Black bars represent standard error.

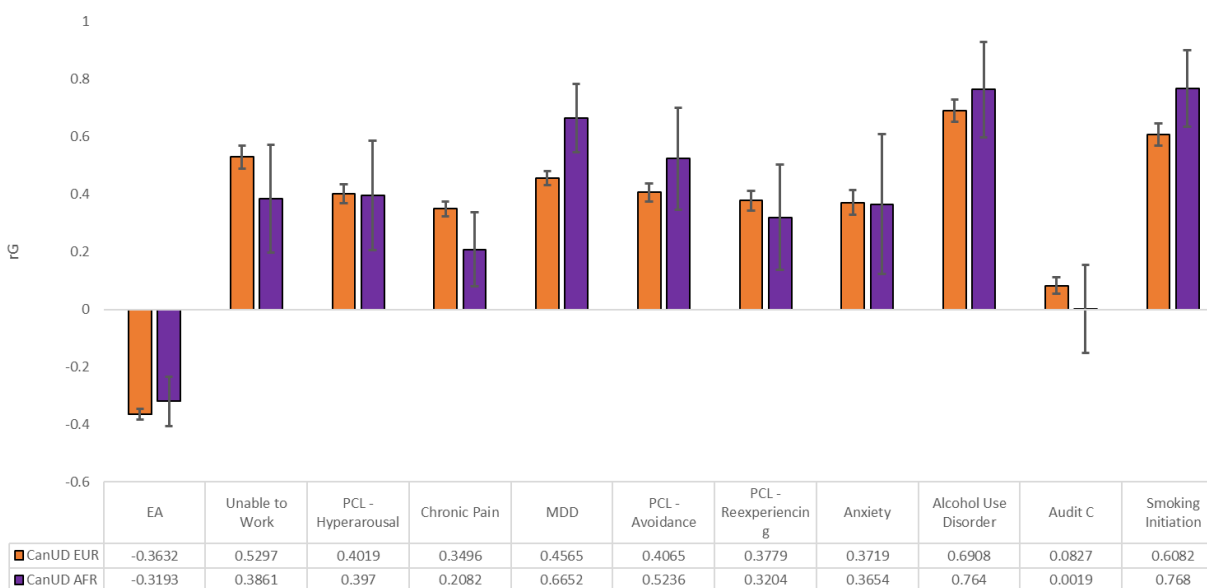

Supplementary Figure 4. ShinyGO dendrogram. Pathway enrichment.

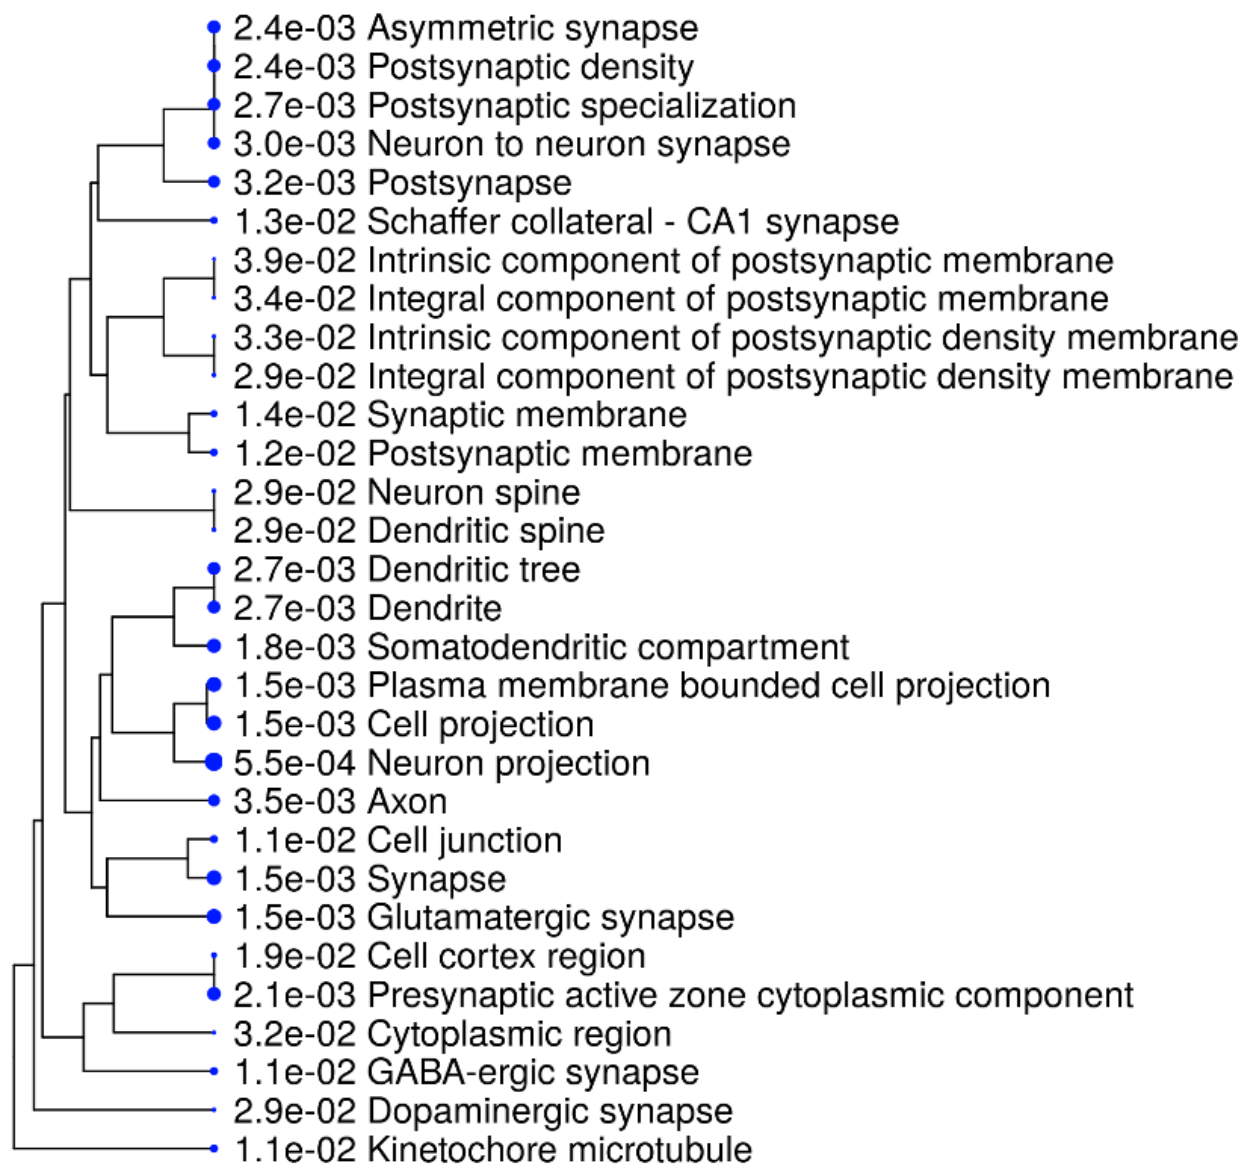

Supplementary Figure 5. MTAG plots for AUD. Tests were two sided. GWS threshold was used to determine significance ( $5 \times 10^{-8}$ ).

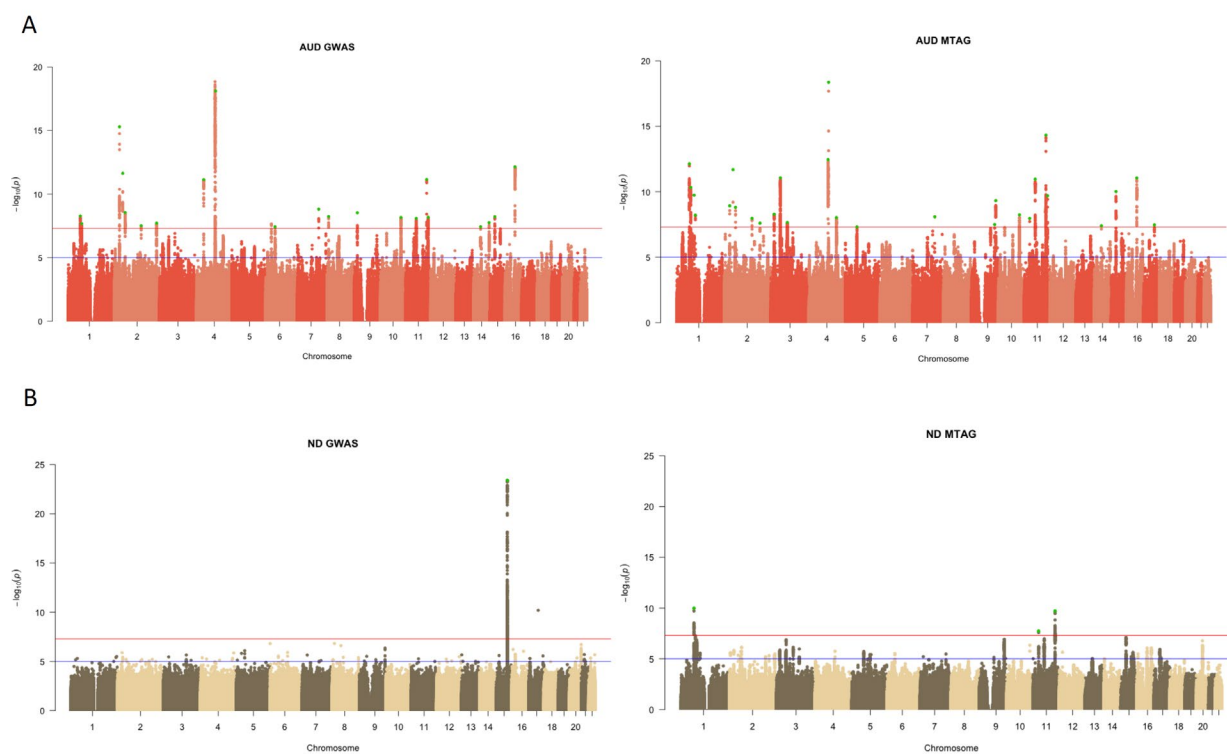



Supplementary Figure 6. GWAS Catalog Reported Gene Enrichment. Uncorrected p-value reported.

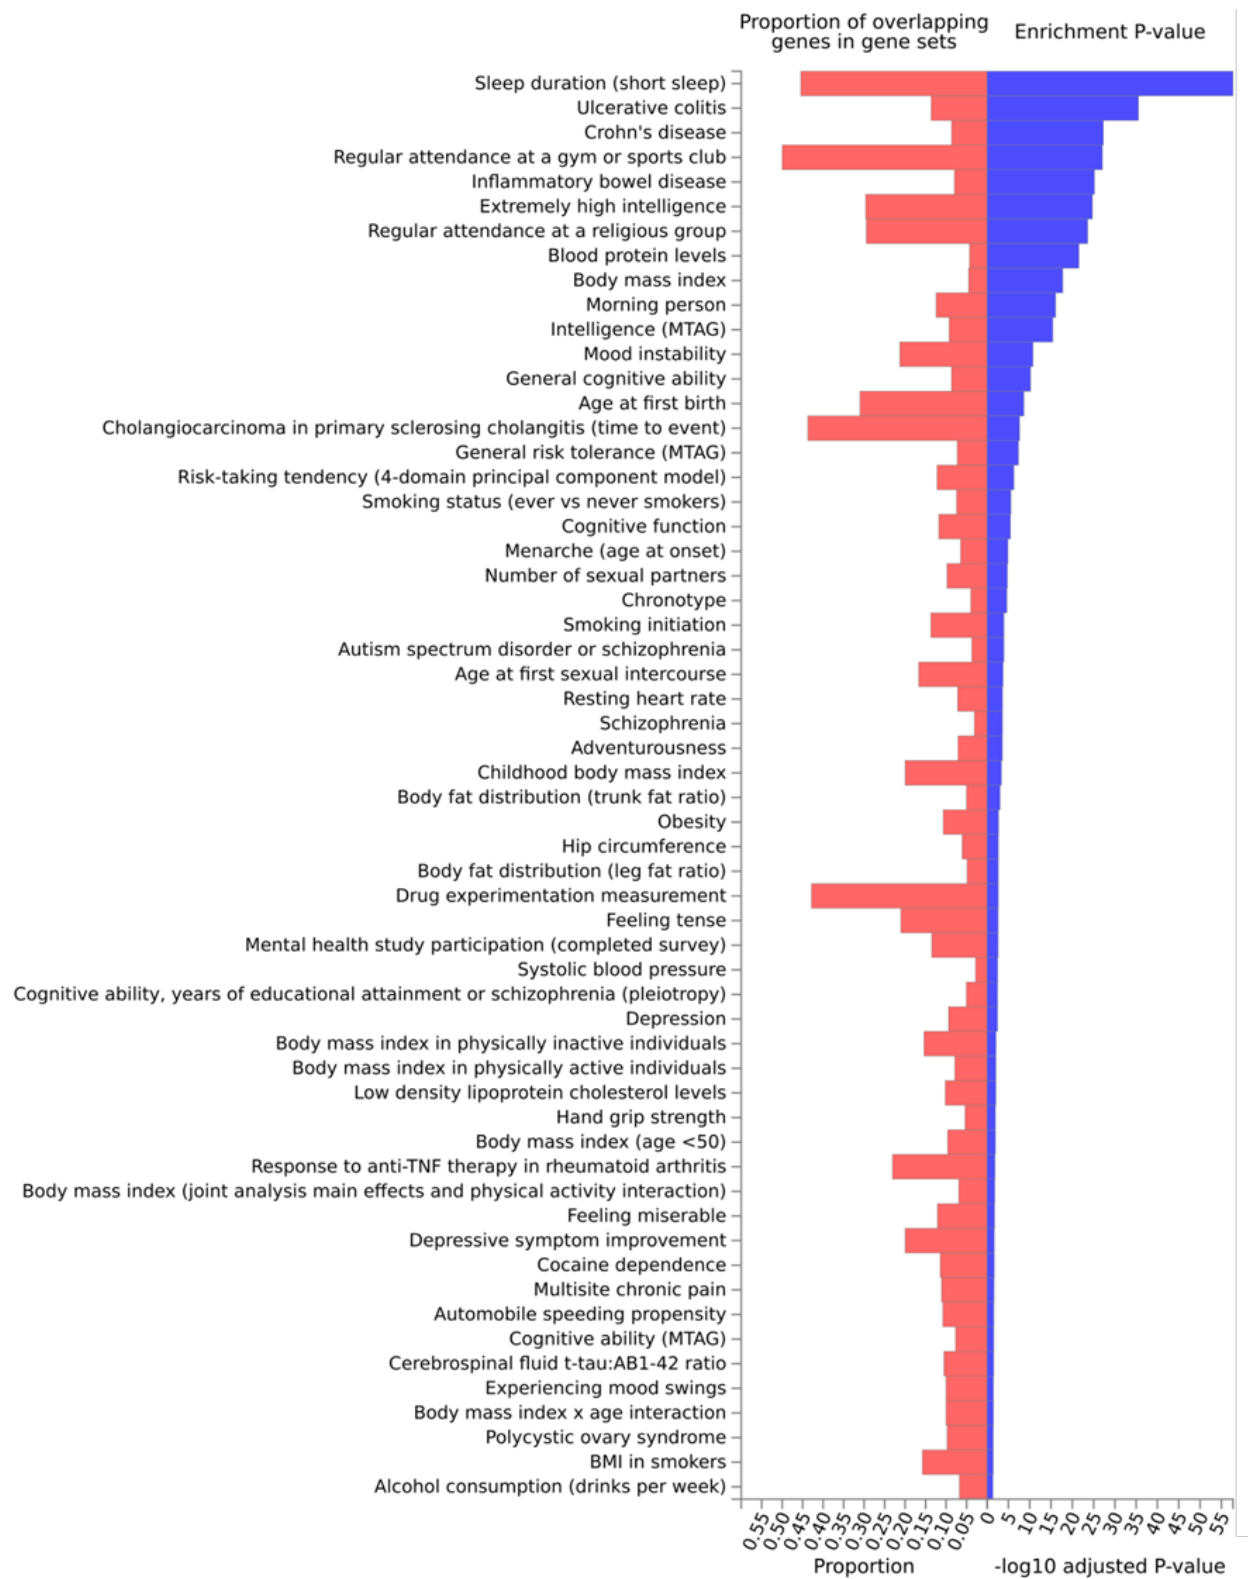

Supplementary Figure 7. Sex Stratified GWAS Within the MVP. Above, Female. Below, Male.

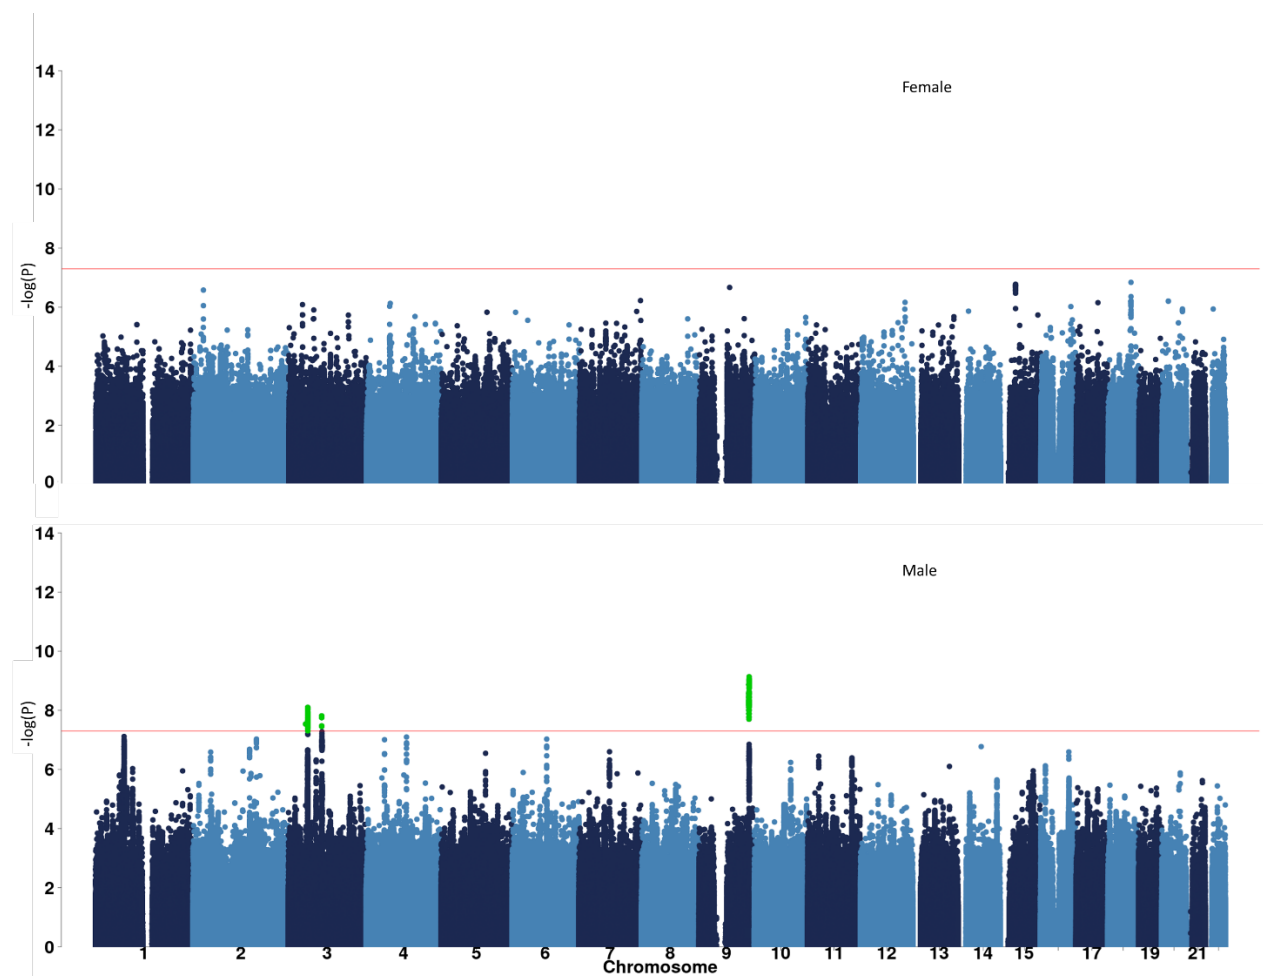

Supplement: 41588_2023_1563_MOESM1_ESM.pdf [file 41588_2023_1563_MOESM1_ESM.pdf]
